# Supplementary material for: Performance and Emission Multi-Objective Optimization of γ-Al2O3 Nanoparticle-Enhanced E10 Bioethanol–Gasoline Combustion in Spark-Ignition Engines
Source: Research Square preprint supplement (doi:10.21203/rs.3.rs-7703508/v1), 2025-11-27
Supplement: Supplementary file 1 [file eed18eb240de6455e3e08549.docx]

| **Appendix A.1** |  |  |  |  |  |
| --- | --- | --- | --- | --- | --- |
| Repeated measurements of fuel flow rate (g/hr) | | | | | |
| Engine Speed (rpm) | Test 1 | Test 2 | Test 3 | Mean | SD |
| 1500 | 3870 | 3845 | 3856 | 3857.0 | 12.7 |
| 2000 | 5258 | 5241 | 5250 | 5249.8 | 8.7 |
| 2500 | 7195 | 7183 | 7191 | 7189.6 | 6.0 |
| 3000 | 8543 | 8557 | 8552 | 8550.9 | 7.0 |

| **Appendix A.2** |  |  |  |  |  |
| --- | --- | --- | --- | --- | --- |
| Repeated measurement of BP (kW) | | | | | |
| Engine Speed (rpm) | Test 1 | Test 2 | Test 3 | Mean | SD |
| 1500 | 16.65 | 16.72 | 16.68 | 16.68 | 0.036 |
| 2000 | 22.34 | 22.38 | 22.36 | 22.36 | 0.021 |
| 2500 | 29.20 | 29.26÷ | 29.23 | 29.23 | 0.030 |
| 3000 | 34.32 | 34.36 | 34.34 | 34.34 | 0.021 |

| **Appendix A.3** |  | |  |  |
| --- | --- | --- | --- | --- |
| Relative uncertainty values (%) | | | | |
| Engine Speed (rpm) | Relative Uncertainty of Fuel Flow (%) | Relative Uncertainty of BP (%) | | Relative Uncertainty of BSFC (%) |
| 1500 | 0.20 | | 0.52 | 0.56 |
| 2000 | 0.20 | | 0.07 | 0.21 |
| 2500 | 0.20 | | 0.85 | 0.87 |
| 3000 | 0.20 | | 0.14 | 0.24 |
| Mean | — | | 0.4 | 0.47 |
